# Supplementary material
Source: publisher figshare collection journal article supplement (https://aacr.figshare.com/articles/dataset/_/22449657)

Supplementary Figure 1

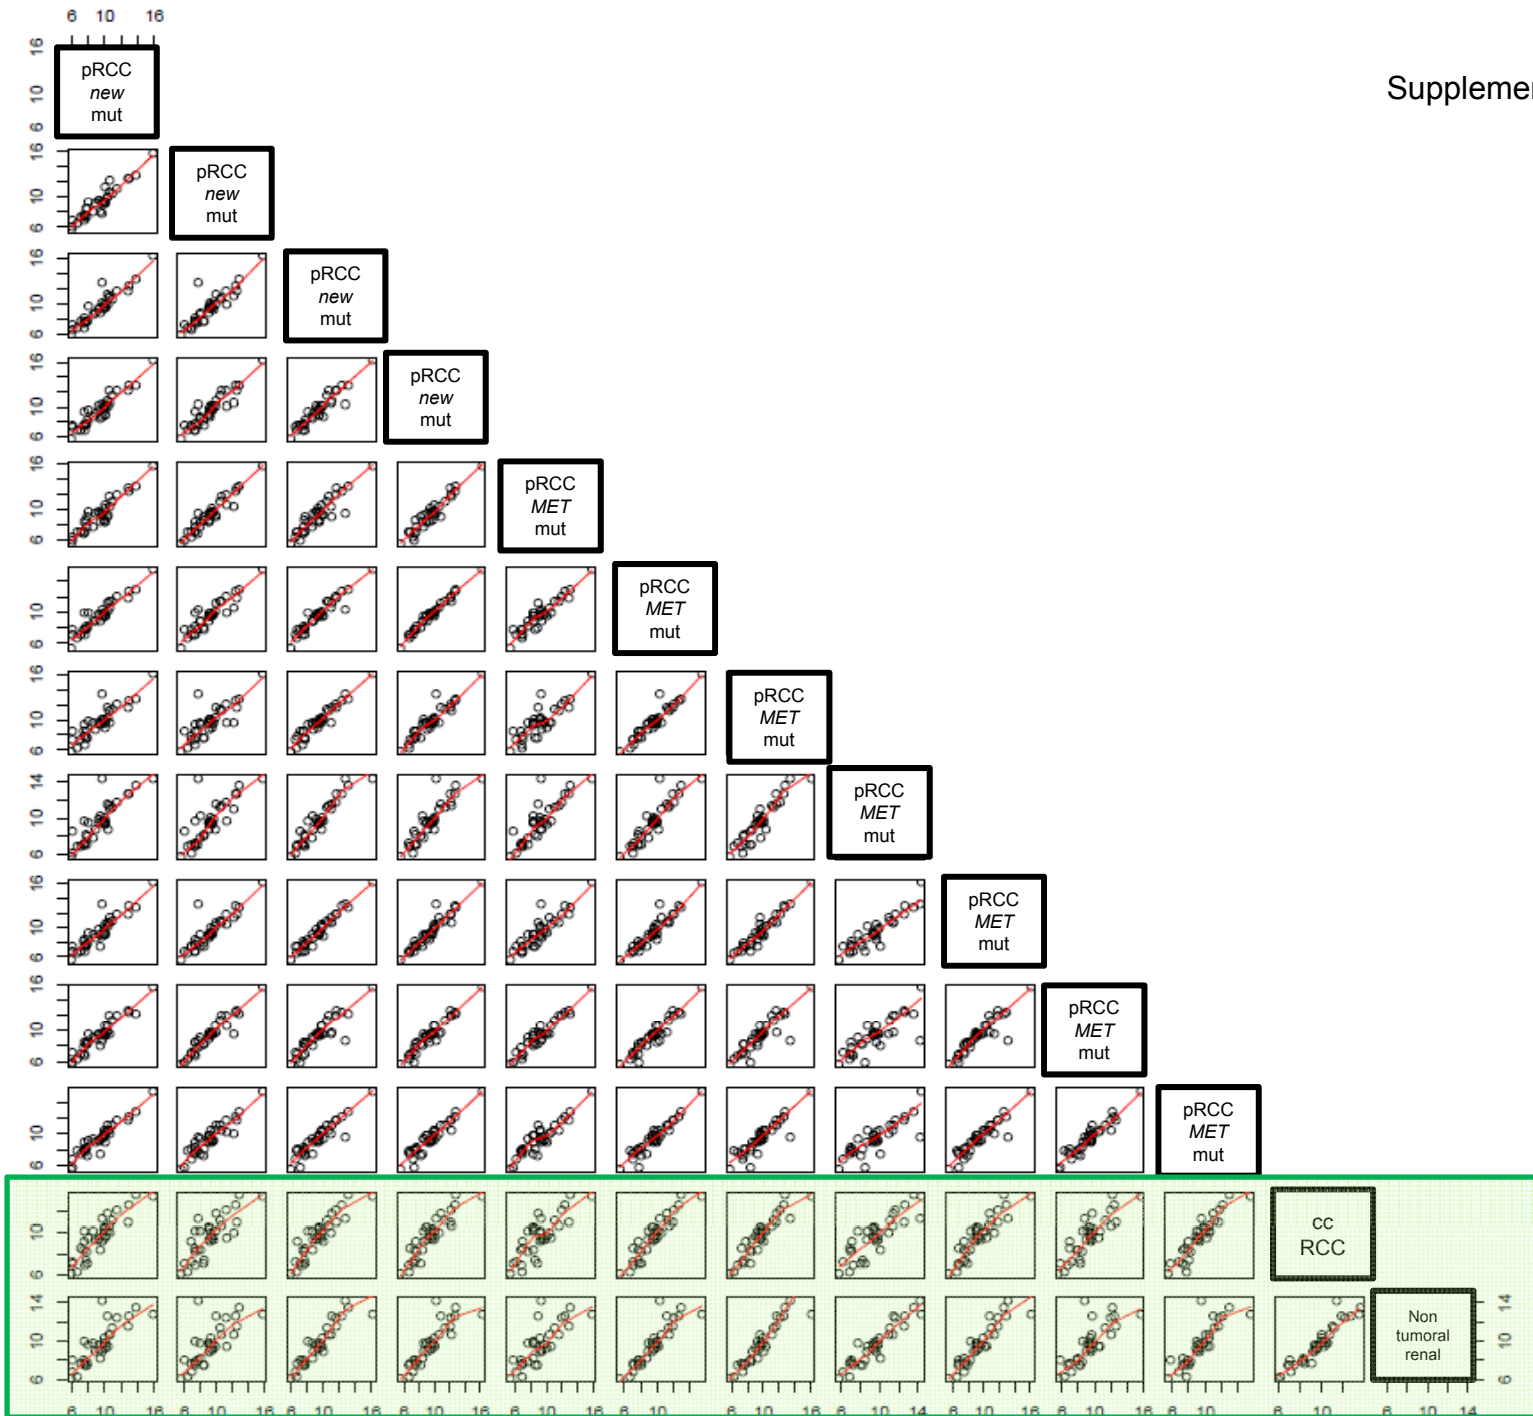

Supplement: Supplementary file 1 [file 39900723]
